# Supplementary material for: Multilevel proteomic analyses reveal molecular diversity between diffuse-type and intestinal-type gastric cancer
Source: PubMed Central journal article supplement (PMC9929250; doi:10.1038/s41467-023-35797-6), 2023-02-14
Supplement: 41467_2023_35797_MOESM1_ESM.pdf [file 41467_2023_35797_MOESM1_ESM.pdf]

| Characteristic                             | DGC (n=83) | IGC (n=102) |
|--------------------------------------------|------------|-------------|
| <b>Age -----no.(%)</b>                     |            |             |
| ≥50                                        | 62 (75%)   | 89 (87%)    |
| <50                                        | 21 (25%)   | 13 (13%)    |
| <b>Gender -----no.(%)</b>                  |            |             |
| Male                                       | 55 (66%)   | 79 (77%)    |
| Female                                     | 28 (34%)   | 23 (23%)    |
| <b>TNM stage -----no.(%)</b>               |            |             |
| I                                          | 5 (6%)     | 15 (15%)    |
| II                                         | 24 (29%)   | 33 (32%)    |
| III                                        | 50 (60%)   | 50 (49%)    |
| IV                                         | 4 (5%)     | 4 (4%)      |
| <b>Chemotherapy ----- no.( %)</b>          |            |             |
| Chemotherapy                               | 65 (78%)   | 73 (72%)    |
| No Chemotherapy                            | 18 (22%)   | 29 (28%)    |
| <b>Lymphovascular invasion-----no.( %)</b> |            |             |
| Positive                                   | 53 (64%)   | 38 (37%)    |
| Negative                                   | 30 (36%)   | 62 (61%)    |
| Unknown                                    |            | 2 (2%)      |
| <b>Live status-----no.( %)</b>             |            |             |
| Dead                                       | 35 (42%)   | 35 (34%)    |
| Alive                                      | 48 (58%)   | 67 (66%)    |
| <b>Disease free survival-----no.( %)</b>   |            |             |
| Yes                                        | 33 (40%)   | 38 (37%)    |
| No                                         | 46 (55%)   | 63 (62%)    |
| Unknown                                    | 4 (5%)     | 1 (1%)      |

**Supplementary Table 1. The baseline clinical characteristics of GC patients.** Patient numbers are shown in table.

|                               | Subtypes                      | Patient numbers          |     |          |     |
|-------------------------------|-------------------------------|--------------------------|-----|----------|-----|
| <b>DGC</b>                    | Proteomic subtypes            | D-1                      | D-2 | D-3      |     |
|                               | TF activity subtypes D-1      | 15                       | 18  | 3        |     |
|                               | TF activity subtypes D-2      | 8                        | 10  | 25       |     |
|                               | p value                       |                          |     | 0.0001   |     |
|                               | Phosphoproteomic subtypes     | D-1                      | D-2 | D-3      |     |
|                               | TF activity subtypes D-1      | 20                       | 14  | 3        |     |
|                               | TF activity subtypes D-2      | 7                        | 23  | 13       |     |
|                               | p value                       |                          |     | 0.0008   |     |
|                               | Proteomic subtypes            | D-1                      | D-2 | D-3      |     |
|                               | Phosphoproteomic subtypes D-1 | 10                       | 11  | 2        |     |
|                               | Phosphoproteomic subtypes D-2 | 9                        | 13  | 15       |     |
|                               | Phosphoproteomic subtypes D-3 | 2                        | 3   | 11       |     |
|                               | p value                       |                          |     | 0.003    |     |
|                               | <b>IGC</b>                    | Proteomic subtypes       | I-1 | I-2      | I-3 |
|                               |                               | TF activity subtypes I-1 | 11  | 23       | 5   |
| TF activity subtypes I-2      |                               | 7                        | 25  | 20       |     |
| p value                       |                               |                          |     | 0.0159   |     |
| Phosphoproteomic subtypes     |                               | I-1                      | I-2 | I-3      |     |
| TF activity subtypes I-1      |                               | 12                       | 11  | 7        |     |
| TF activity subtypes I-2      |                               | 15                       | 14  | 22       |     |
| p value                       |                               |                          |     | 0.1668   |     |
| Proteomic subtypes            |                               | I-1                      | I-2 | I-3      |     |
| Phosphoproteomic subtypes I-1 |                               | 2                        | 24  | 1        |     |
| Phosphoproteomic subtypes I-2 |                               | 22                       | 1   | 7        |     |
| Phosphoproteomic subtypes I-3 |                               | 2                        | 11  | 14       |     |
| p value                       |                               |                          |     | 5.36E-13 |     |

**Supplementary Table2. The statistical analysis of the correspondence among subtypes from three datasets.** Patient numbers are shown in table. P values by two-sided chi-square test.

# Supplementary Figure 1

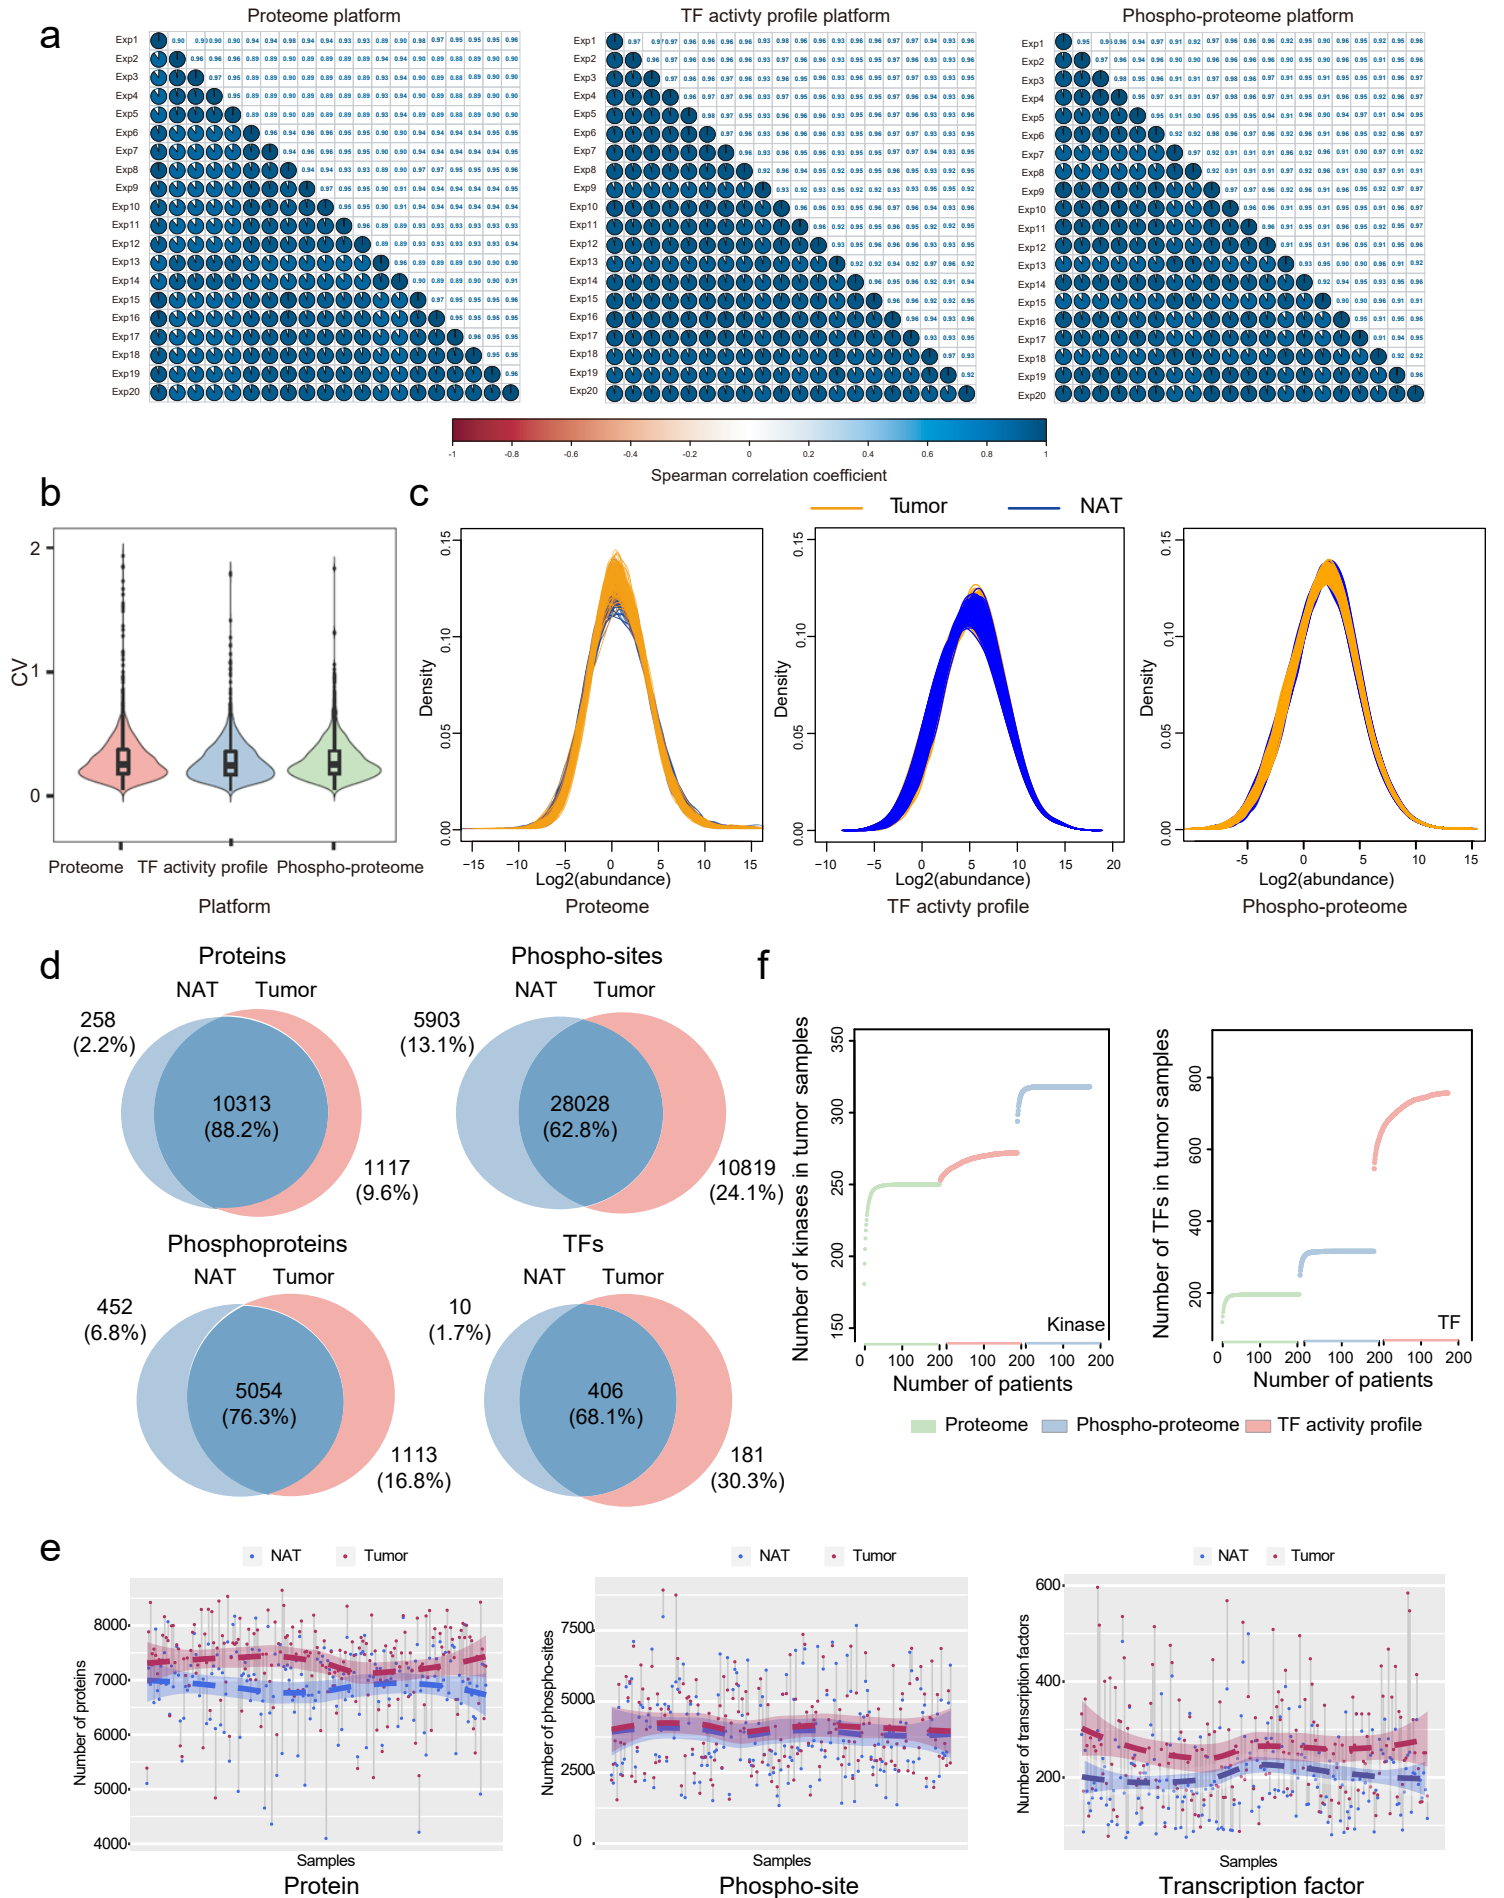

**Supplementary Figure 1. Construction of human GC multilevel proteomic atlas.**

Related to Figure 1. **a**, Correlation analysis of twenty 293T samples as MS quality control to evaluate the robustness of label-free quantification. Top-right half panel: pairwise calculation of spearman's correlation coefficients between twenty samples; bottom-left half panel: pairwise comparison of twenty samples by scatterplots. **b**, The CV distribution of three platforms. n(standards)=20 in each platform. Violin plots showed median and interquartile range. **c**, Density plots indicating distribution of protein abundance in tumor tissues (orange) and NATs (blue). **d**, Overview of the proteome, phospho-proteome and TF activity profiles of GC patients. Shown are the numbers of proteins, phospho-sites, phosphoproteins and TFs identified in tumor tissues and NATs. **e**, Pairwise comparison of proteins, phospho-sites, and TFs identified in tumor tissues (red dots) and NATs (blue dots). n (proteome) =194, n (phospho-proteome) = 184, and n (TF activity profile) = 196 biologically independent samples. The dashed curves fitted by lasso regression showed the distribution of protein identifications. The shading that underlies the lasso curves denoted the 95% confidence intervals. **f**, Saturation curve of kinases and TFs identification. Different colors indicate different datasets.

# Supplementary Figure 2

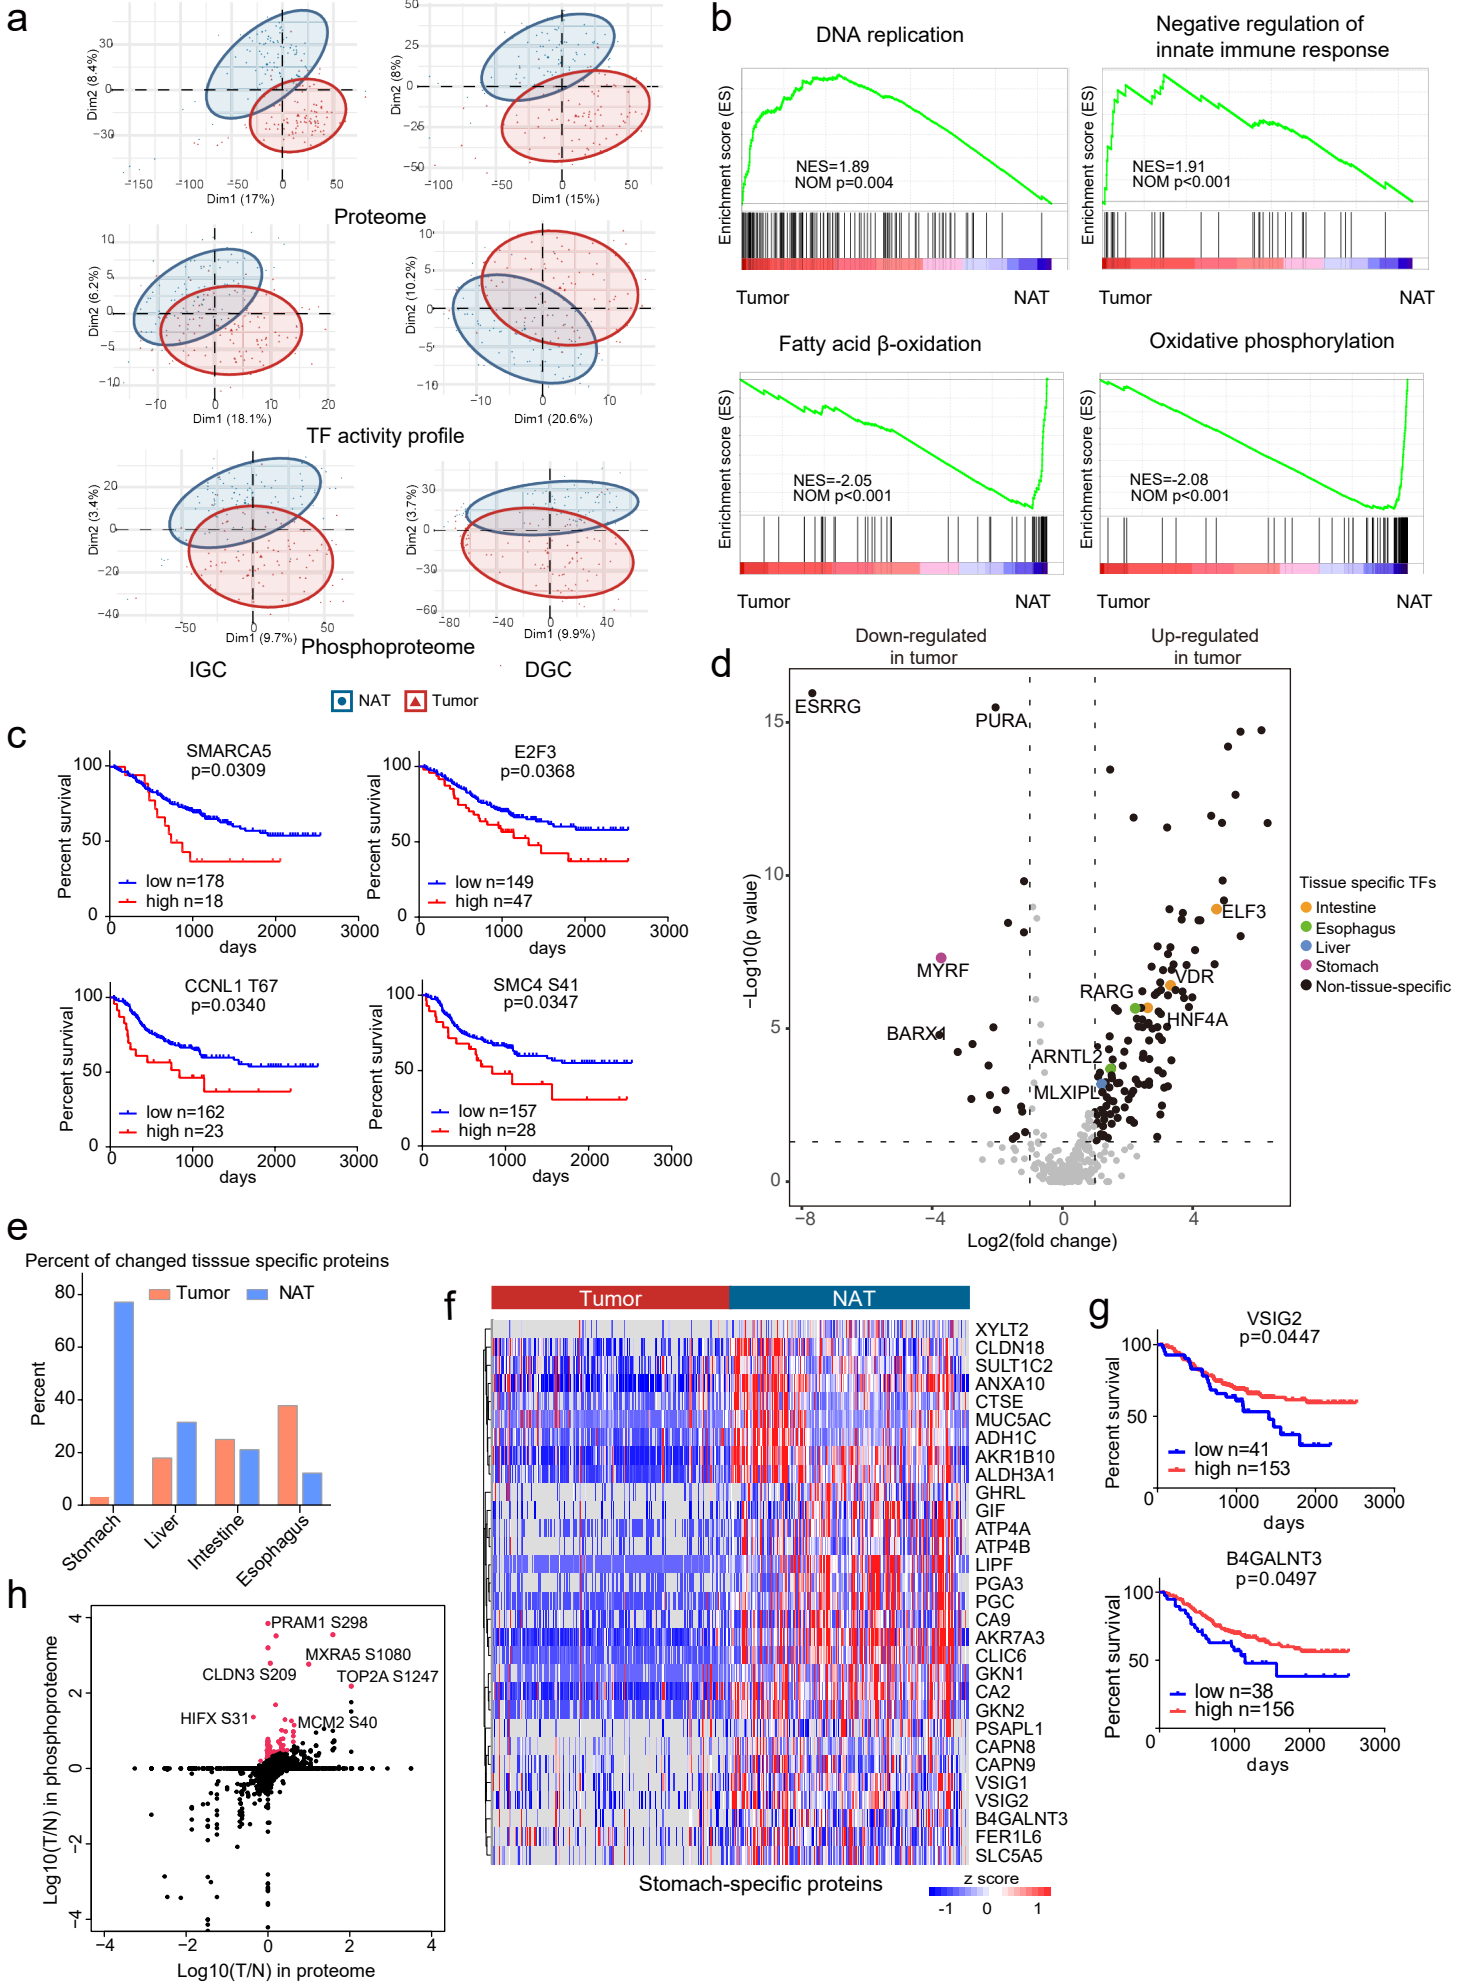

**Supplementary Figure 2. Multilevel proteomic features of tumor tissues and NATs in GC.** Related to Figure 1. **a**, PCA of proteome, phospho-proteome, and TF activity profiles in 196 paired GC patients. Red, tumor tissues; blue, NATs. Left, IGC; right, DGC. **b**, GSEA revealed overrepresented pathways in tumor tissues and NATs. **c**, Clinical outcomes of TFs and phospho-sites involved in cell cycle. SMARCA5: n (low) = 178 and n (high) = 18 biologically independent samples. E2F3: n (low) = 149 and n (high) = 47 biologically independent samples. CCNL1 T67: n (low) = 162 and n (high) = 23 biologically independent samples. SMC4 S41: n (low) = 157 and n (high) = 28 biologically independent samples. P values were from Log-rank test. **d**, A volcano plot showing the differential TFs activity between tumor tissues and NATs. Tissue specific TFs are shown. The p values were from Wilcoxon paired signed-rank test, and adjusted using Benjamini-Hochberg (BH) correction. **e**, Percentage of upregulated tissue specific proteins in tumor tissues and NATs. **f**, A list of gastric specific proteins that were differentially expressed in tumor tissues and NATs. **g**, VSIG2 and B4GALNT3 were significantly associated with prognoses (p values were from Log-rank test). VSIG2: n (low) = 41 and n (high) = 153 biologically independent samples. B4GALNT3: n (low) = 38 and n (high) = 156 biologically independent samples. **h**, Foldchanges of phospho-sites and corresponding proteins in tumor tissues and NATs. Red dots (defined as cancer related phosphoproteins): changes of phosphoproteins abundance were greater than changes of their corresponding proteins abundance. Source data are provided as a Source Data file.

# Supplementary Figure 3

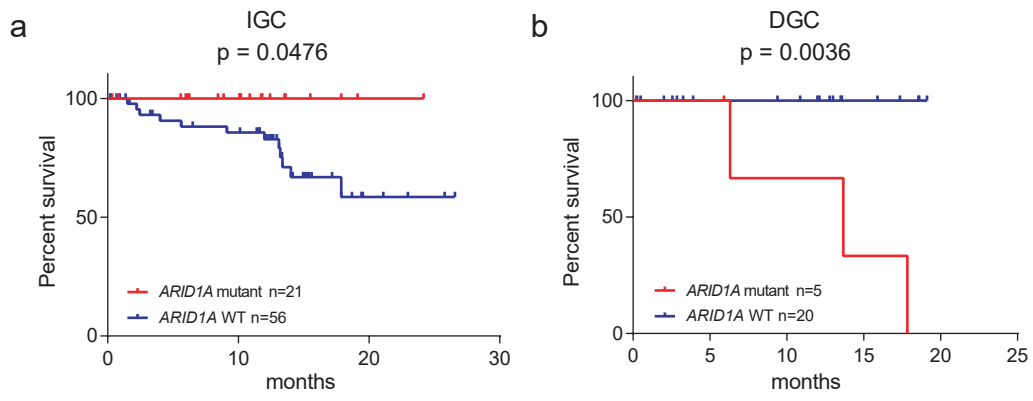

**Supplementary Figure 3. The clinical outcomes of *ARID1A* mutant patients in TCGA cohort.** Related to Figure 2. Log-rank test was performed. **a**, The clinical outcomes of *ARID1A* mutant patients in IGC. n (mutant) = 21 and n (WT) = 56 biologically independent samples. **b**, The clinical outcomes of *ARID1A* mutant patients in DGC. n (mutant) = 5 and n (WT) = 20 biologically independent samples.



# Supplementary Figure 4

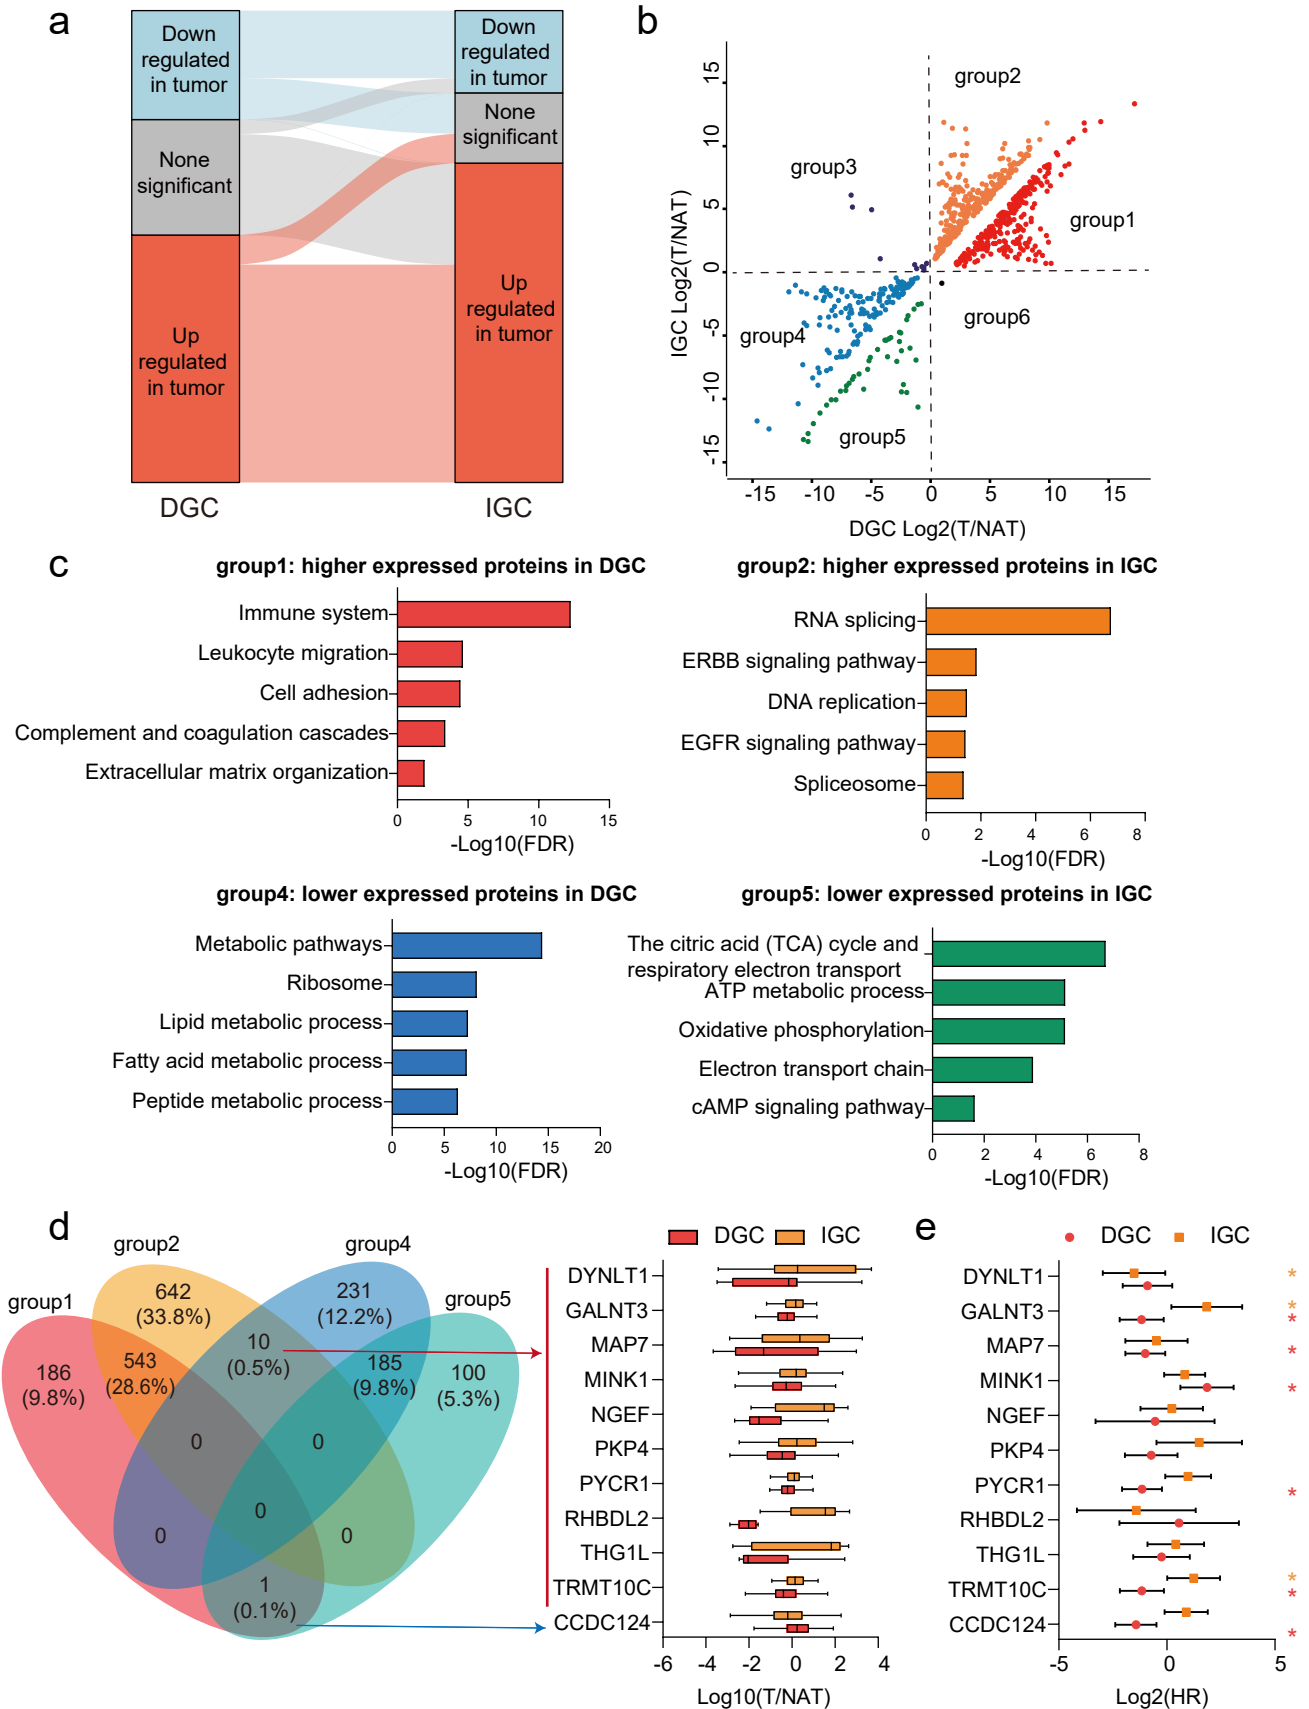

**Supplementary Figure 4. The direction of dysregulated proteins in DGC and IGC.** Related to Figure 3. **a**, The correspondence of up-regulated proteins in tumor tissues (red) and down-regulated proteins in tumor tissues (blue) between DGC and IGC. **b**, Six groups of dysregulated proteins. **c**, Pathway enrichment analysis with differently expressed proteins in four main groups. **d**, The overlap of dysregulated proteins in four groups.  $n$  (DGC) = 79 and  $n$  (IGC) = 92 biologically independent samples. Boxplots showed median (central line), upper and lower quartiles (box limits), min to max range. **e**, The relationship between proteins and prognoses in DGC and IGC. The significant correlation was marked with the asterisk.  $n$  (DGC) = 79 and  $n$  (IGC) = 92 biologically independent samples. The points and error bars showed the median of hazard ratio (HR) and 95% confidence interval (CI). Source data are provided as a Source Data file.

# Supplementary Figure 5

**a**

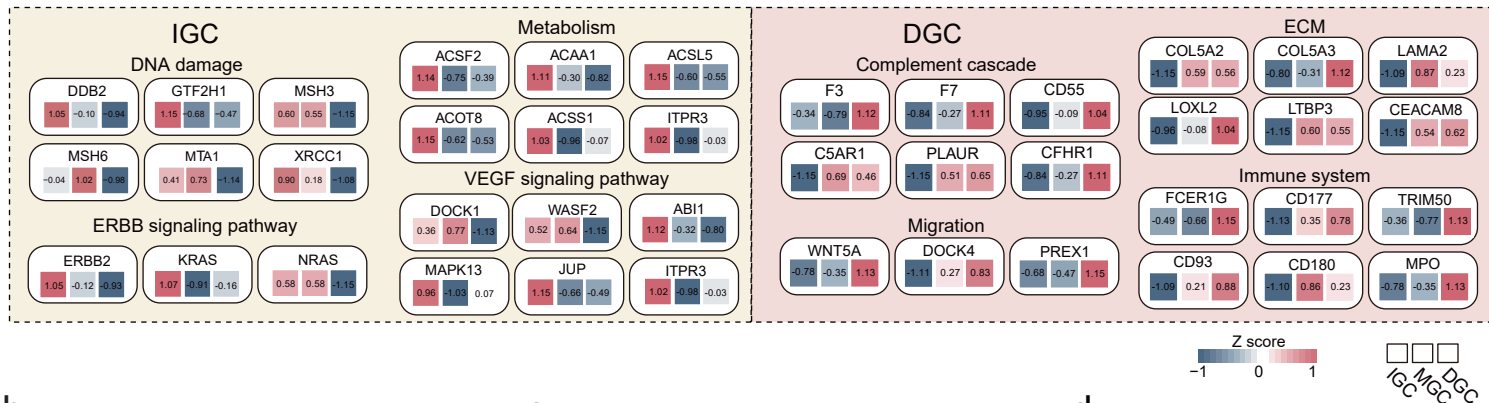

**b**

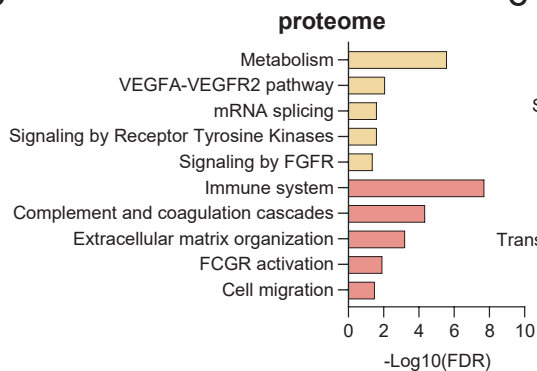

**c**

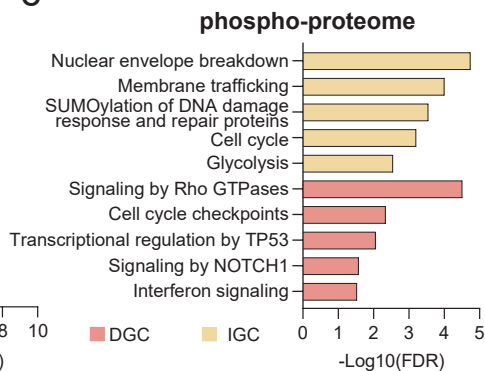

**d**

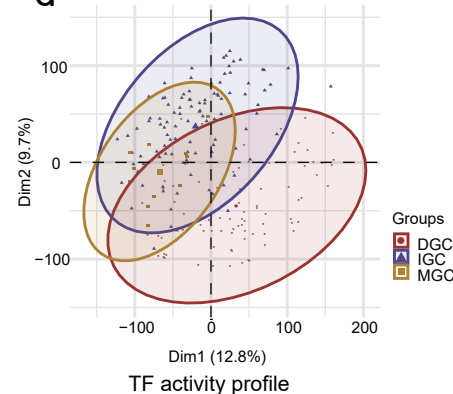

**e**

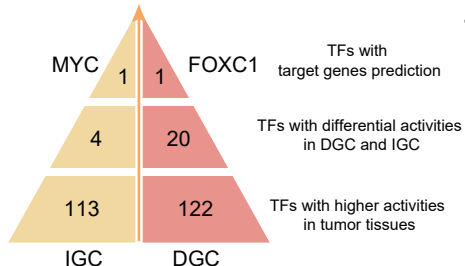

**f**

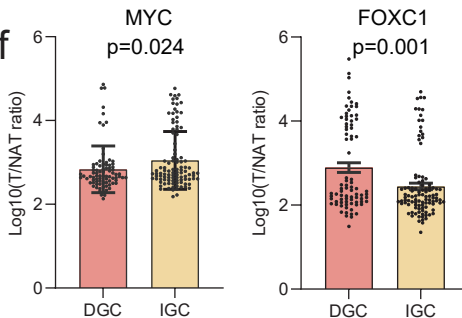

**g**

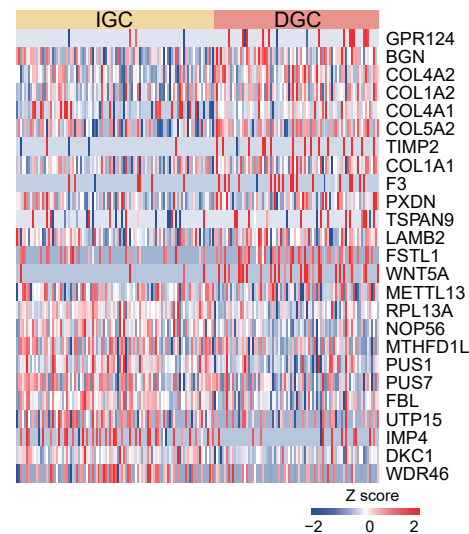

**h**

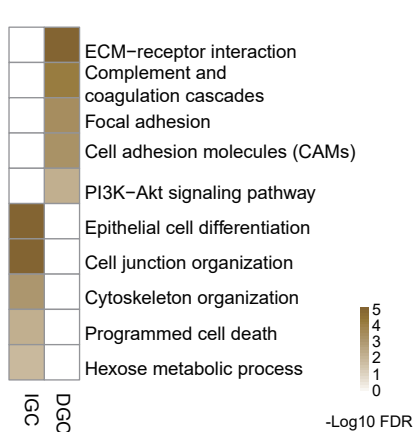

**i**

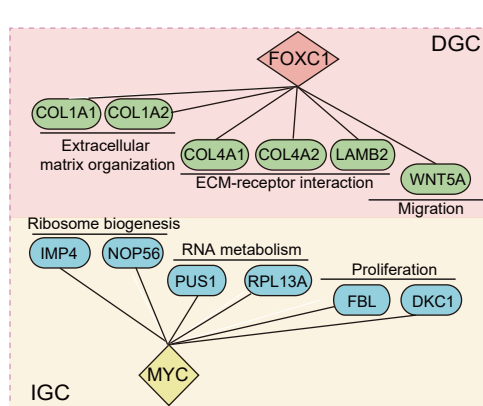

**j**

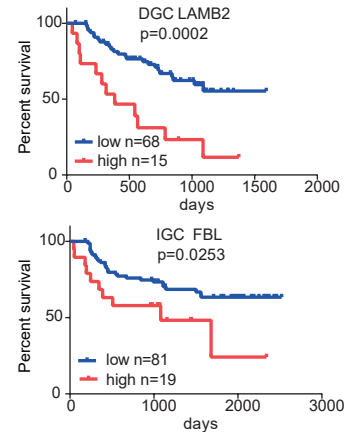

**Supplementary Figure 5. Integrated analysis of differentially activated pathways at protein, TF activity and phosphoprotein levels in DGC and IGC.** Related to Figure 3. **a**, Representative differentially expressed proteins in overrepresented pathways of IGC and DGC. **b**, Pathway analysis of differentially expressed proteins between tumor tissues and NATs in IGC and DGC. **c**, Pathway analysis of differentially expressed phosphoproteins between IGC and DGC. **d**, PCA of TF activity profiles in 196 GC patients. Red, DGC; blue, IGC; orange, MGC. **e**, Identification of master TFs maintaining pathological types. **f**, The activities of master TFs in DGC and IGC. n (DGC) = 83 and n (IGC) = 102 biologically independent samples. The data was shown as mean  $\pm$  SEM. P-values were calculated using two-sided student's t test. **g**, The expression of TGs regulated by master TFs in DGC and IGC. **h**, Pathway analysis of TGs regulated by altered TFs in DGC and IGC. **i**, The master TF and TG pairs in DGC and IGC. **j**, The association of TGs with clinical outcomes. LAMB2: n (low) = 68 and n (high) = 15 biologically independent samples. FBL: n (low) = 81 and n (high) = 19 biologically independent samples. P values were from Log-rank test. Source data are provided as a Source Data file.

# Supplementary Figure 6

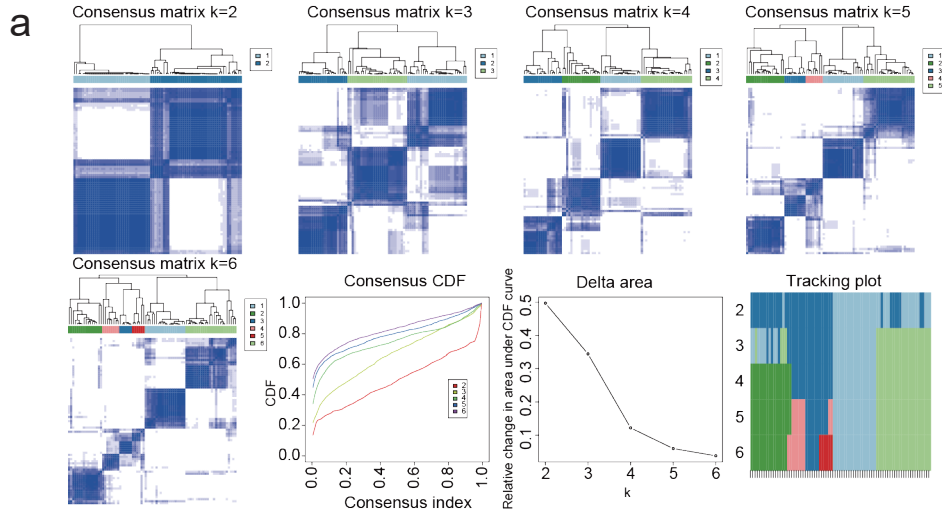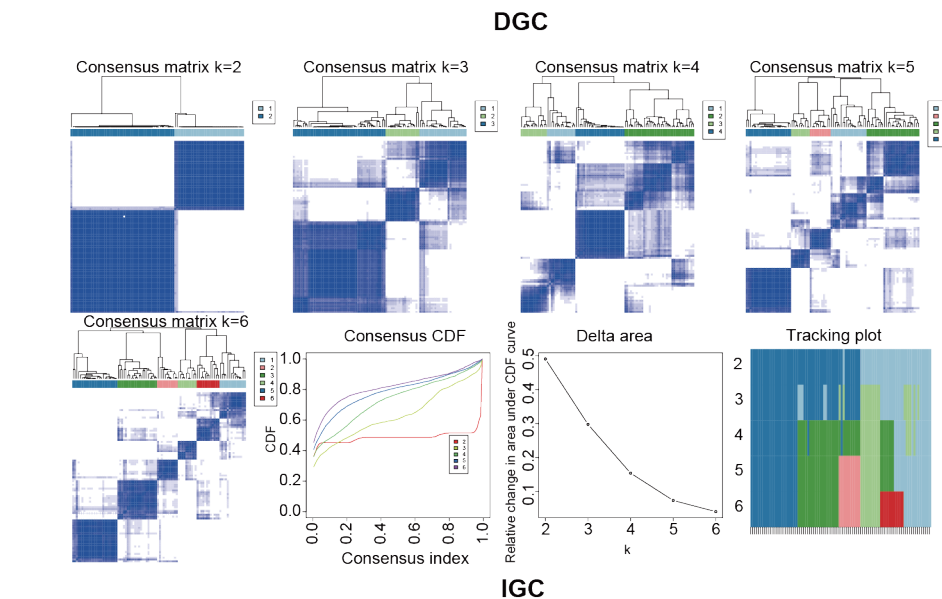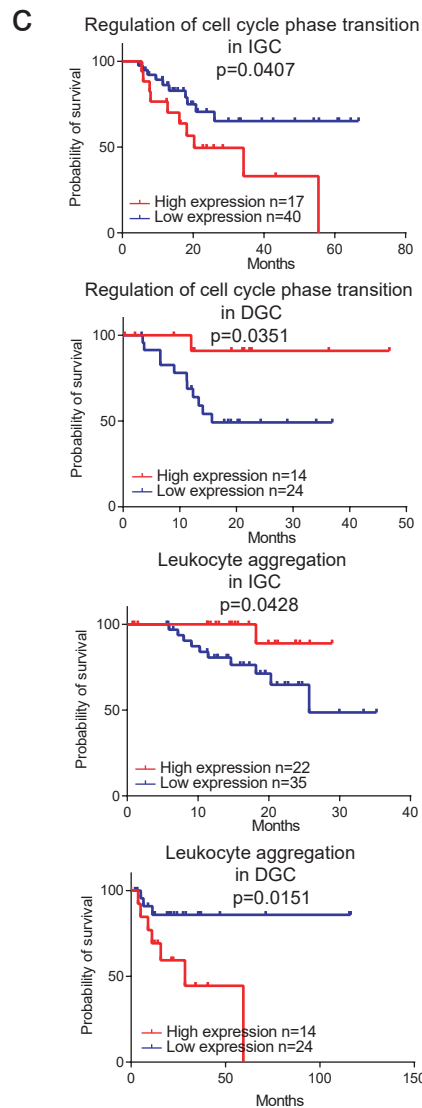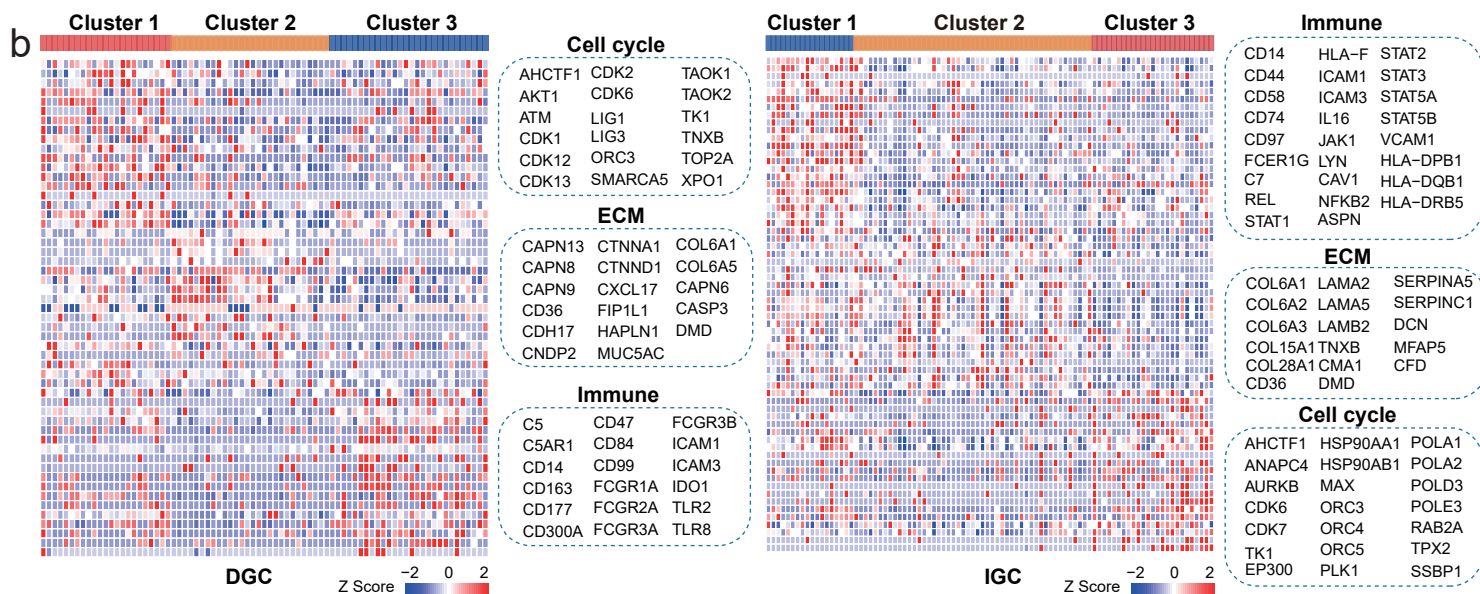

**Supplementary Figure 6. Proteomic subtypes of GC patients.** Related to Figure 4. **a**, Consensus matrices of identified clusters ( $k = 2$  to  $6$ ) of DGC and IGC proteomic subtypes. **b**, Representative differentially expressed proteins in the overrepresented pathways among three DGC and IGC proteomic subtypes. **c**, ssGSEA revealed the cell cycle and immune related pathways had opposite prognoses between DGC and IGC. Regulation of cell cycle phase transition in IGC:  $n$  (low) = 40 and  $n$  (high) = 17 biologically independent samples. Regulation of cell cycle phase transition in DGC:  $n$  (low) = 24 and  $n$  (high) = 14 biologically independent samples. Leukocyte aggregation in IGC:  $n$  (low) = 35 and  $n$  (high) = 22 biologically independent samples. Leukocyte aggregation in DGC:  $n$  (low) = 24 and  $n$  (high) = 14 biologically independent samples. The  $p$  values were from Log rank test.

# Supplementary Figure 7

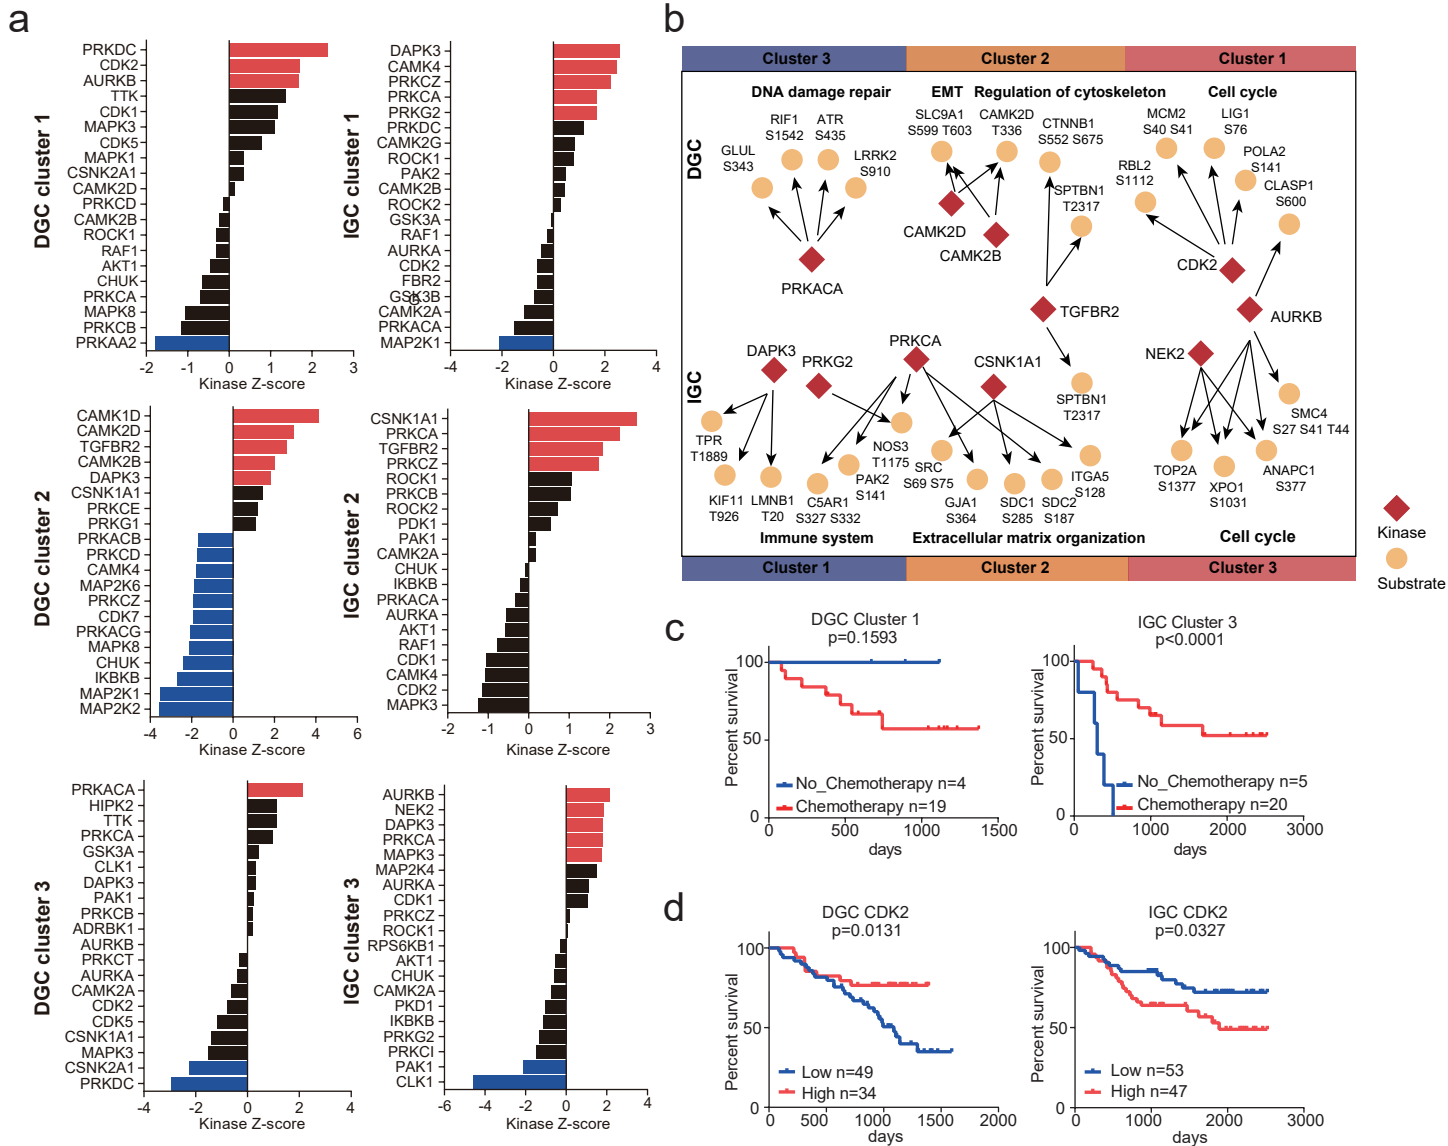

**Supplementary Figure 7. Kinases alteration in proteomic subtypes.** Related to Figure 4. **a**, KSEA analysis of kinase activities in each GC proteomic subtype. **b**, Summary of the kinases and their corresponding phospho-sites and the activated pathways in the proteomic subtypes. **c**, The association of adjuvant chemotherapy with clinical outcomes in DGC cluster 1 and IGC cluster 3. DGC cluster 1: n (chemotherapy) = 19 and n (no chemotherapy) = 4 biologically independent samples. IGC cluster 3: n (chemotherapy) = 20 and n (no chemotherapy) = 5 biologically independent samples. P values were from Log-rank test. **d**, The association of CDK2 activity with clinical outcomes in DGC and IGC. DGC: n (low) = 49 and n (high) = 34 biologically independent samples. IGC: n (low) = 53 and n (high) = 47 biologically independent samples. P values were from Log-rank test. Source data are provided as a Source Data file.



# Supplementary Figure 8

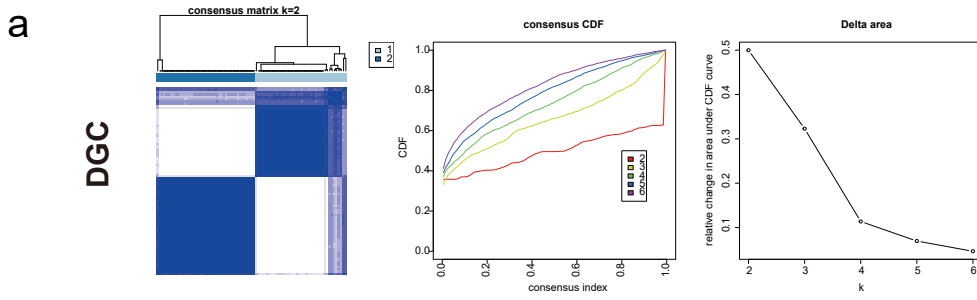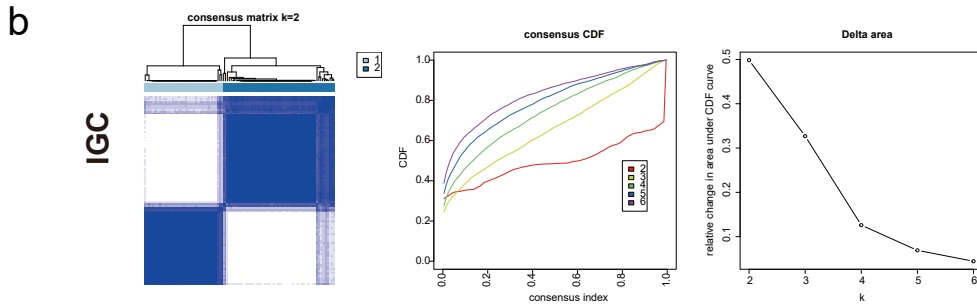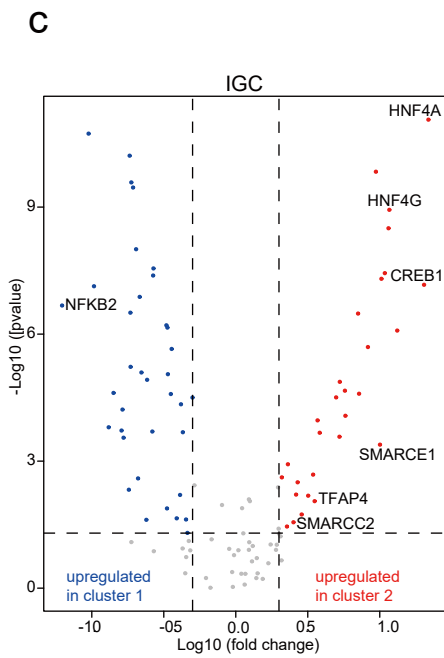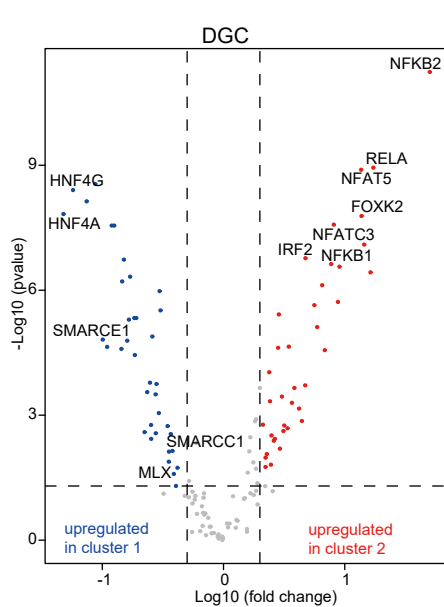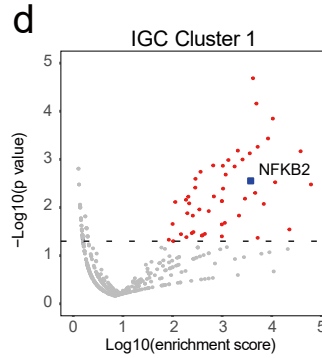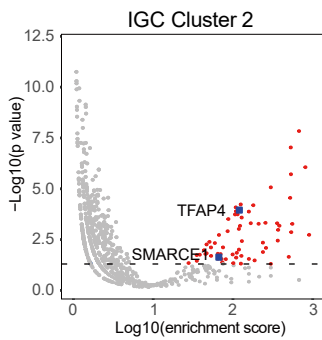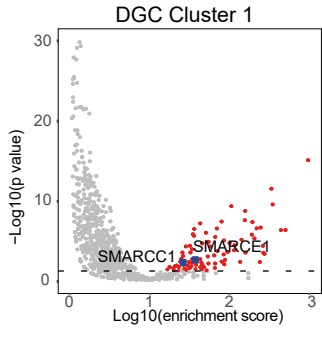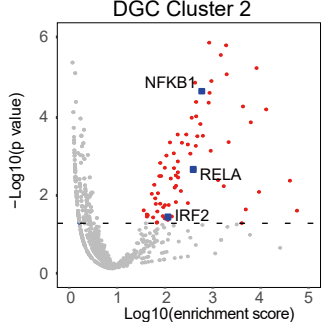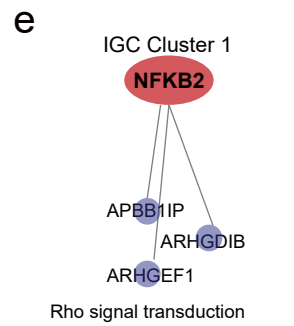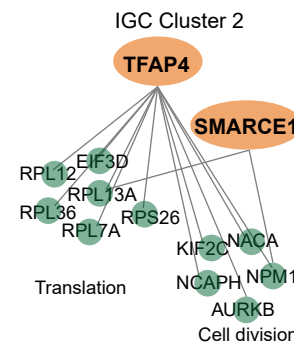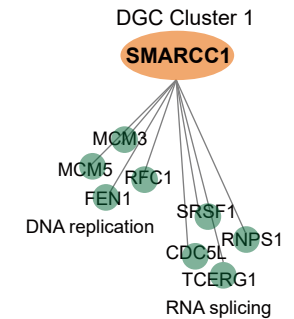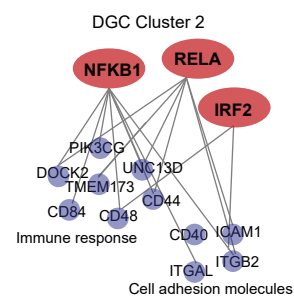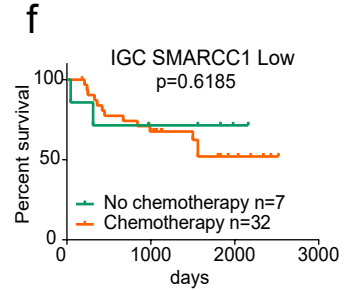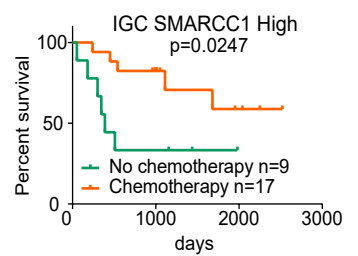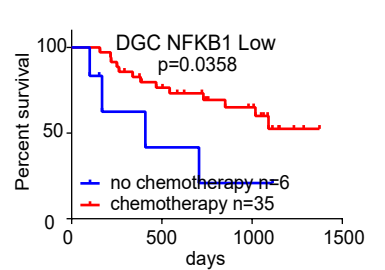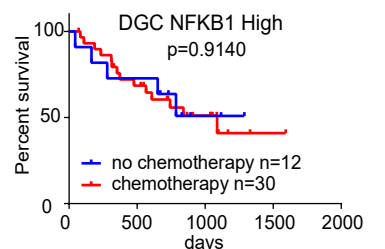

● TFs with target genes prediction

■ TFs with different activities in two subtypes

**Supplementary Figure 8. DGC and IGC subtypes based on TF activity profiles.**

Related to Figure 5. **a**, Consensus clustering analysis of TF activity profiles identified two subtypes in DGC. **b**, Consensus clustering analysis of TF activity profiles identified two subtypes in IGC. **c**, Volcano plots depicted the differential abundance of signature TFs in TF activity-based subtypes. Wilcoxon rank-sum test with Benjamini-Hochberg (BH) adjustment. **d**, Master TFs selection based on protein expression profiling. Hypergeometric test. **e**, TF-TG regulation network in TF activity-based subtypes of DGC and IGC. **f**, The association of adjuvant chemotherapy with DFS in patient groups with or without high master TF activities. IGC SMARCC1 low: n (chemotherapy) = 32 and n (no chemotherapy) = 7 biologically independent samples. IGC SMARCC1 high: n (chemotherapy) = 17 and n (no chemotherapy) = 9 biologically independent samples. DGC NFKB1 low: n (chemotherapy) = 35 and n (no chemotherapy) = 6 biologically independent samples. DGC NFKB1 high: n (chemotherapy) = 30 and n (no chemotherapy) = 12 biologically independent samples. P values were from Log-rank test.

# Supplementary Figure 9

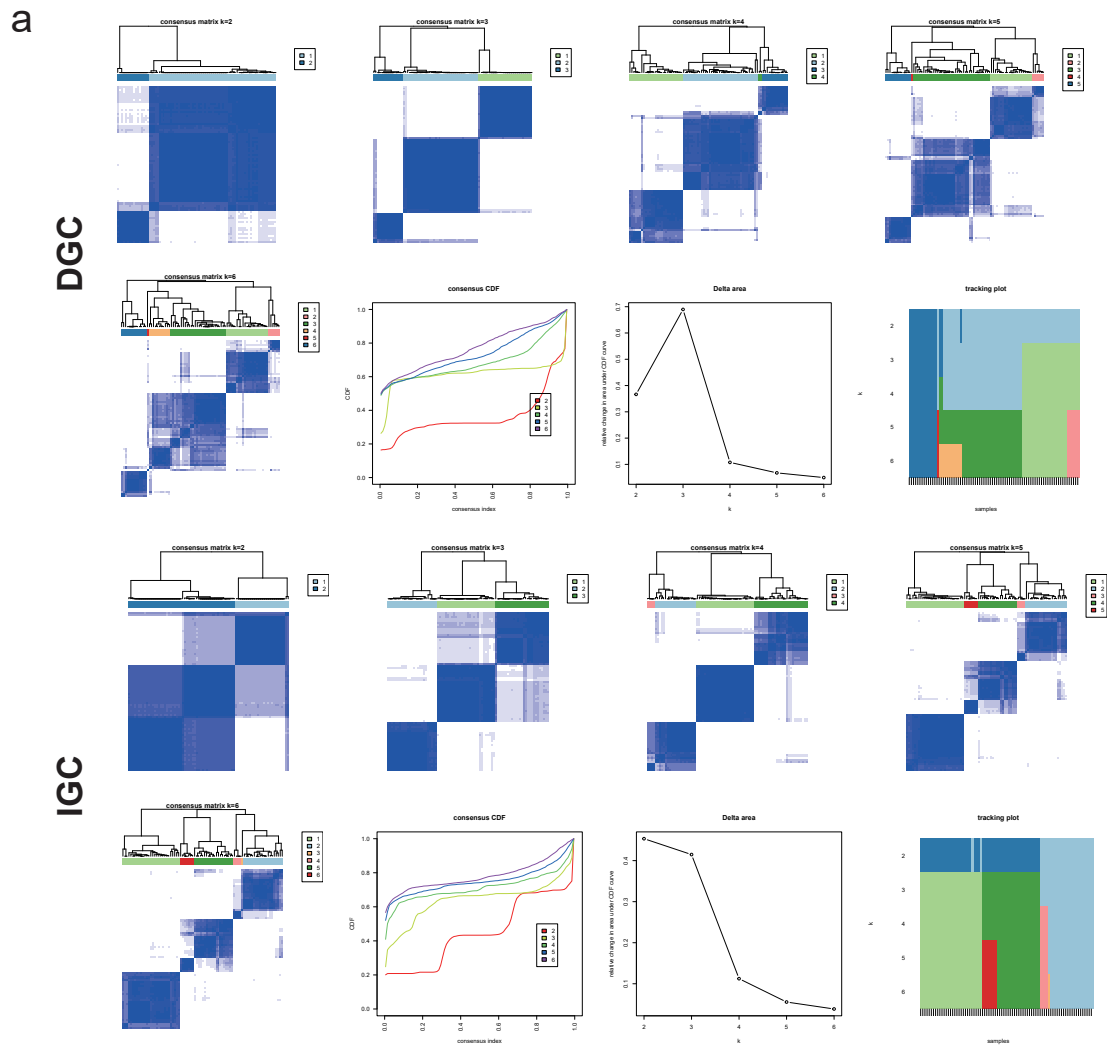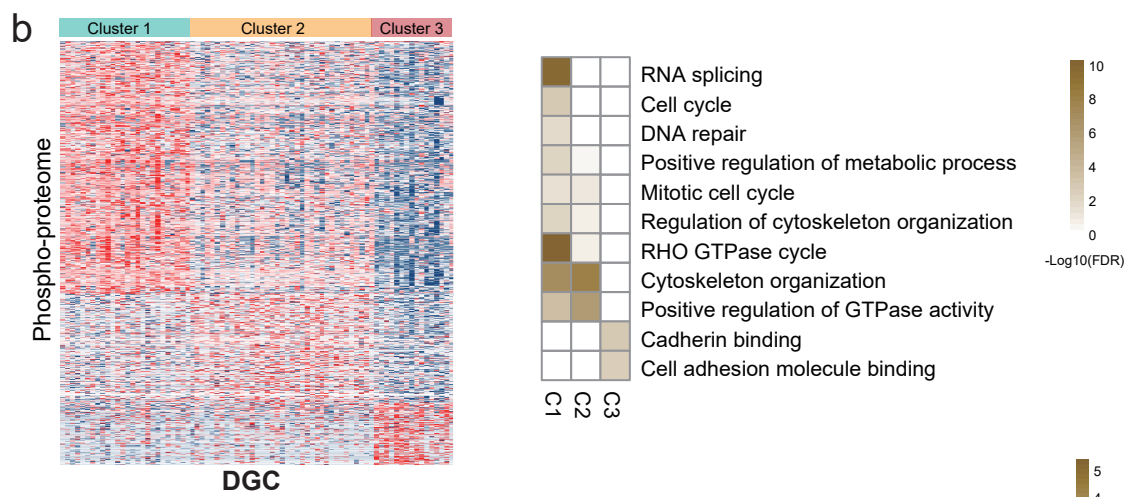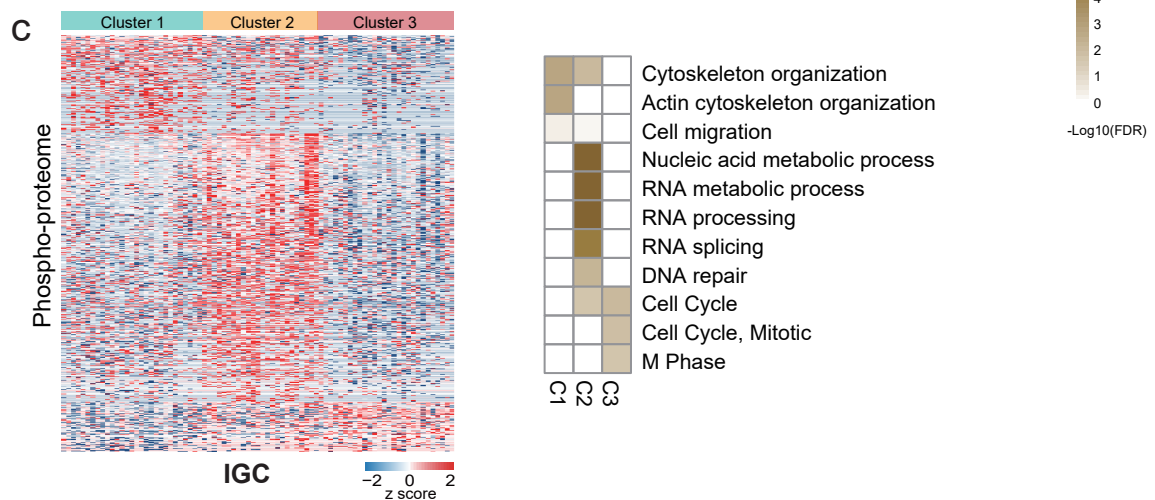

**Supplementary Figure 9. GC subtypes based on phospho-proteomic data.** Related to Figure 6. **a**, Consensus clustering results of phospho-proteomic subtypes of DGC and IGC. **b**, The phospho-sites up-regulated in three subtypes and enriched pathways in three subtypes of DGC. **c**, The phospho-sites up-regulated in three subtypes and enriched pathways in three subtypes of IGC.

# Supplementary Figure 10

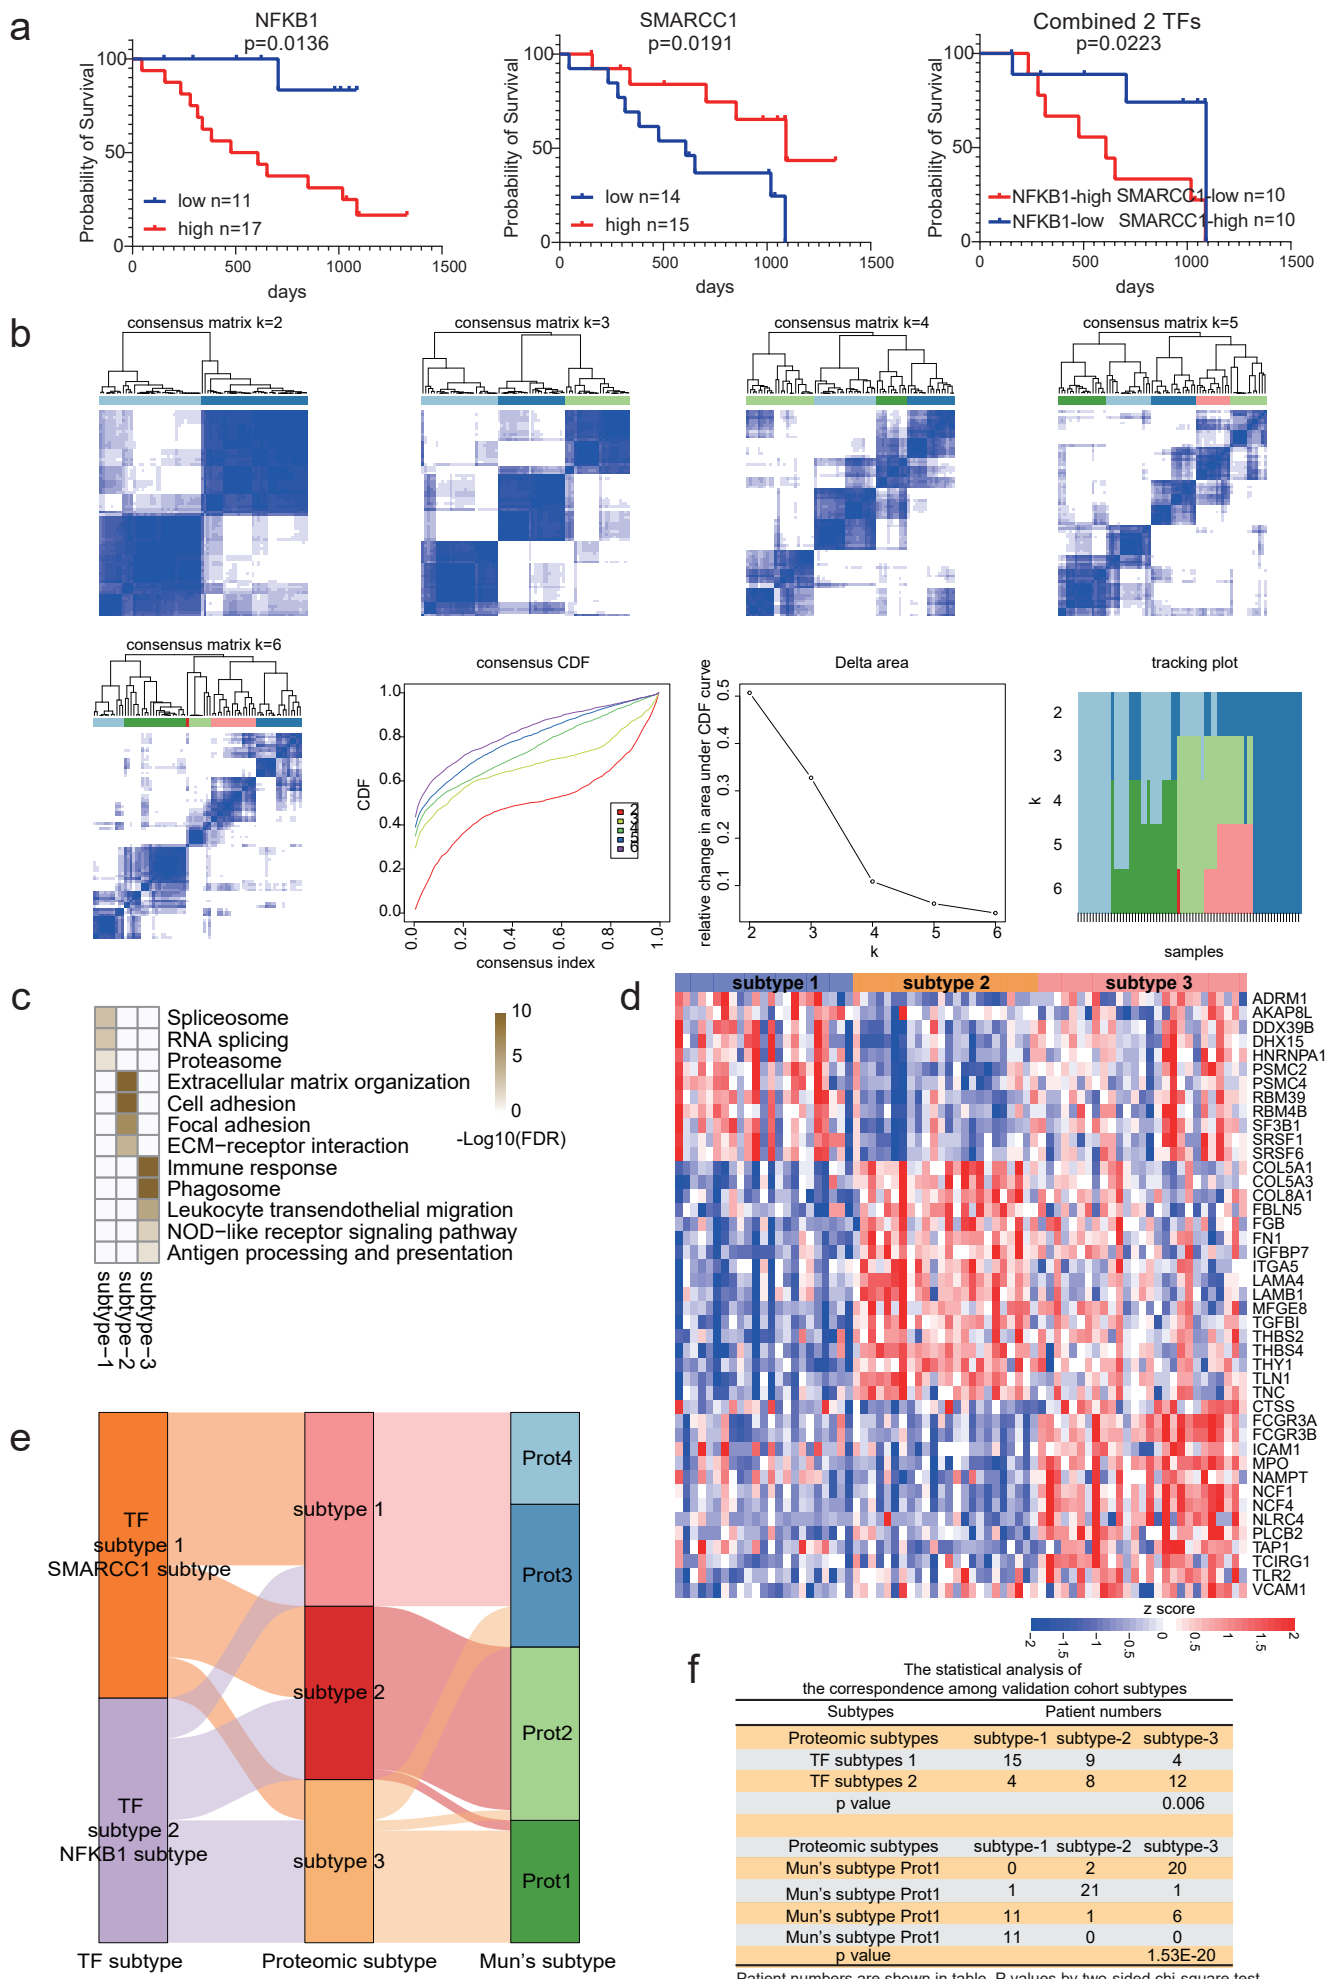

**Supplementary Figure 10. Validation of GC subtypes in Mun's cohort.** Related to Figure 6. **a**, Prognostic analysis about two TFs NFKB1 and SMARCC1. NFKB1: n (low) = 11 and n (high) = 17 biologically independent samples. SMARCC1: n (low) = 14 and n (high) = 15 biologically independent samples. Combined: n (NFKB1 high and SMARCC1 low) = 10 and n (NFKB1 low and SMARCC1 high) = 10 biologically independent samples. The p values were from Log rank test. **b**, Consensus clustering result of Mun's proteomic data. **c**, Pathway enrichment results in three subtypes. **d**, The feature proteins of three subtypes. **e**, Sankey diagram depicting the association of samples classified into proteomic subtypes (center) with TF subtypes (left) and the Mun's subtypes (right). **f**, The statistical analysis of the correspondence among validation cohort subtypes. Patient numbers were shown in table. The p values were from two-sided chi-square test.

# Supplementary Figure 11

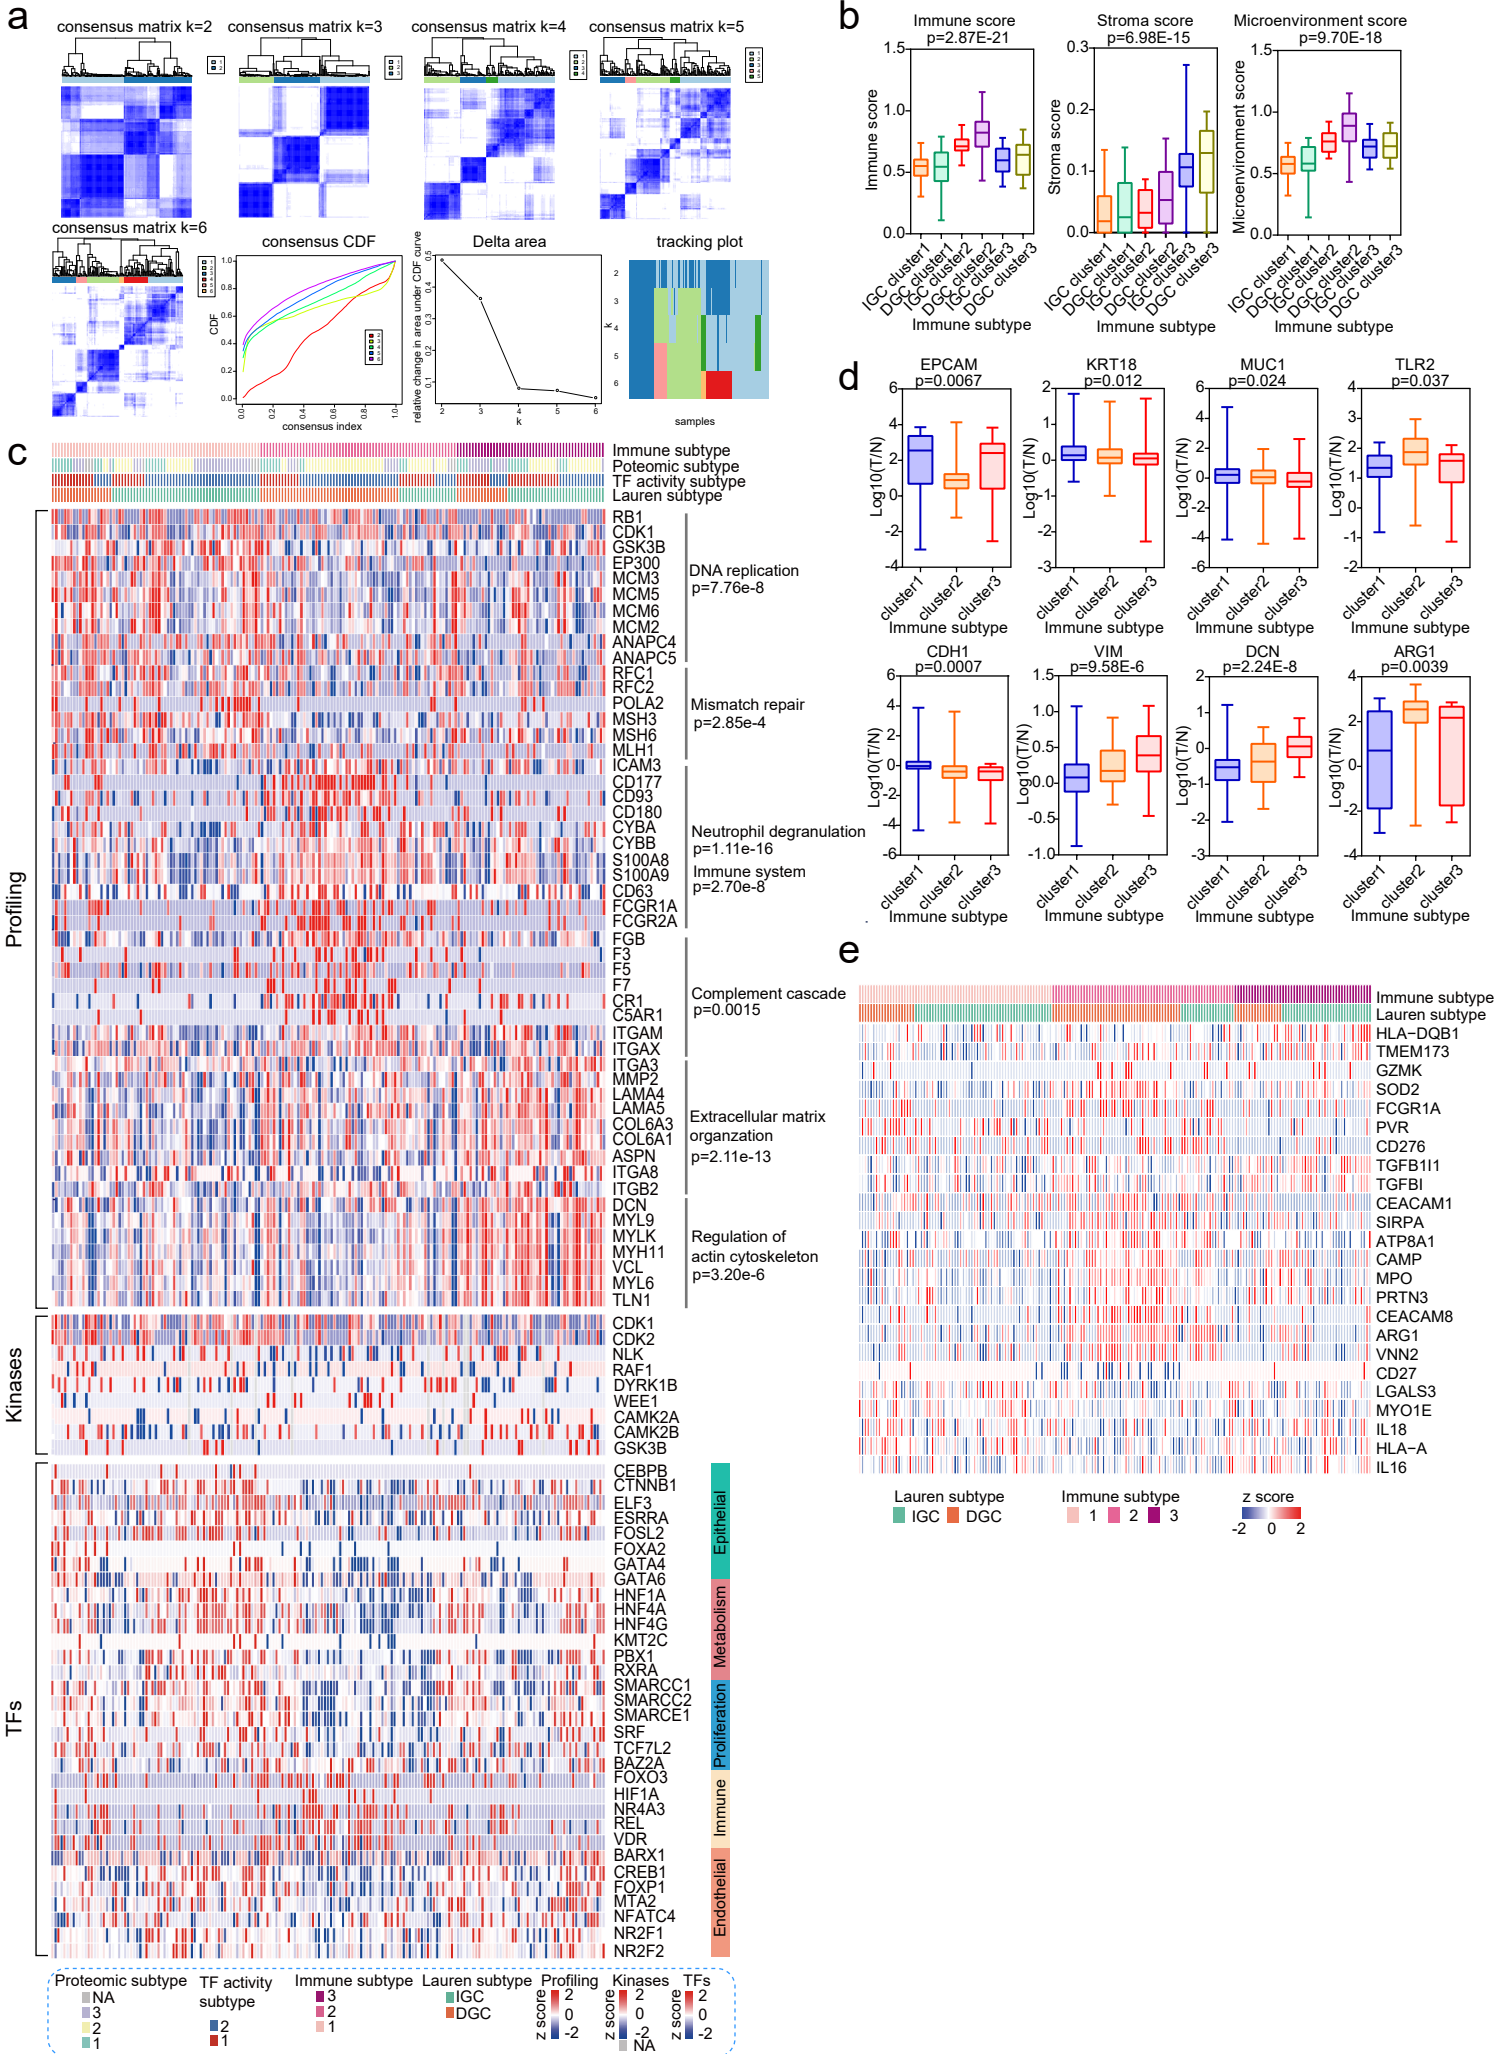

**Supplementary Figure 11. Immune-based subtypes of GC.** Related to Figure 7. **a**, Consensus clustering analysis of xCell scores identified three subtypes in GC. **b**, xCell scores of six immune clusters. P values were from two-sided ANOVA. n (DGC cluster 1) = 20, n (DGC cluster 2) = 46, (DGC cluster 3) = 17, n (IGC cluster 1) = 49, n (IGC cluster 2) = 19, and n (IGC cluster 3) = 32 biologically independent samples. Boxplots showed median (central line), upper and lower quartiles (box limits), min to max range. **c**, Representative differentially expressed proteins, kinases, and TF activities in the featured pathways of immune clusters. The p values were from KEGG pathway enrichment analysis (Fisher's exact test). **d**, Representative lineage-specific protein markers across immune clusters. P values were from two-sided ANOVA. n (cluster 1) = 69, n (cluster 2) = 65, and n (cluster 3) = 49 biologically independent samples. Boxplots showed median (central line), upper and lower quartiles (box limits), min to max range. **e**, Expression of 26 immunotherapeutic targets in clinical development. Source data are provided as a Source Data file.



# Supplementary Figure 12

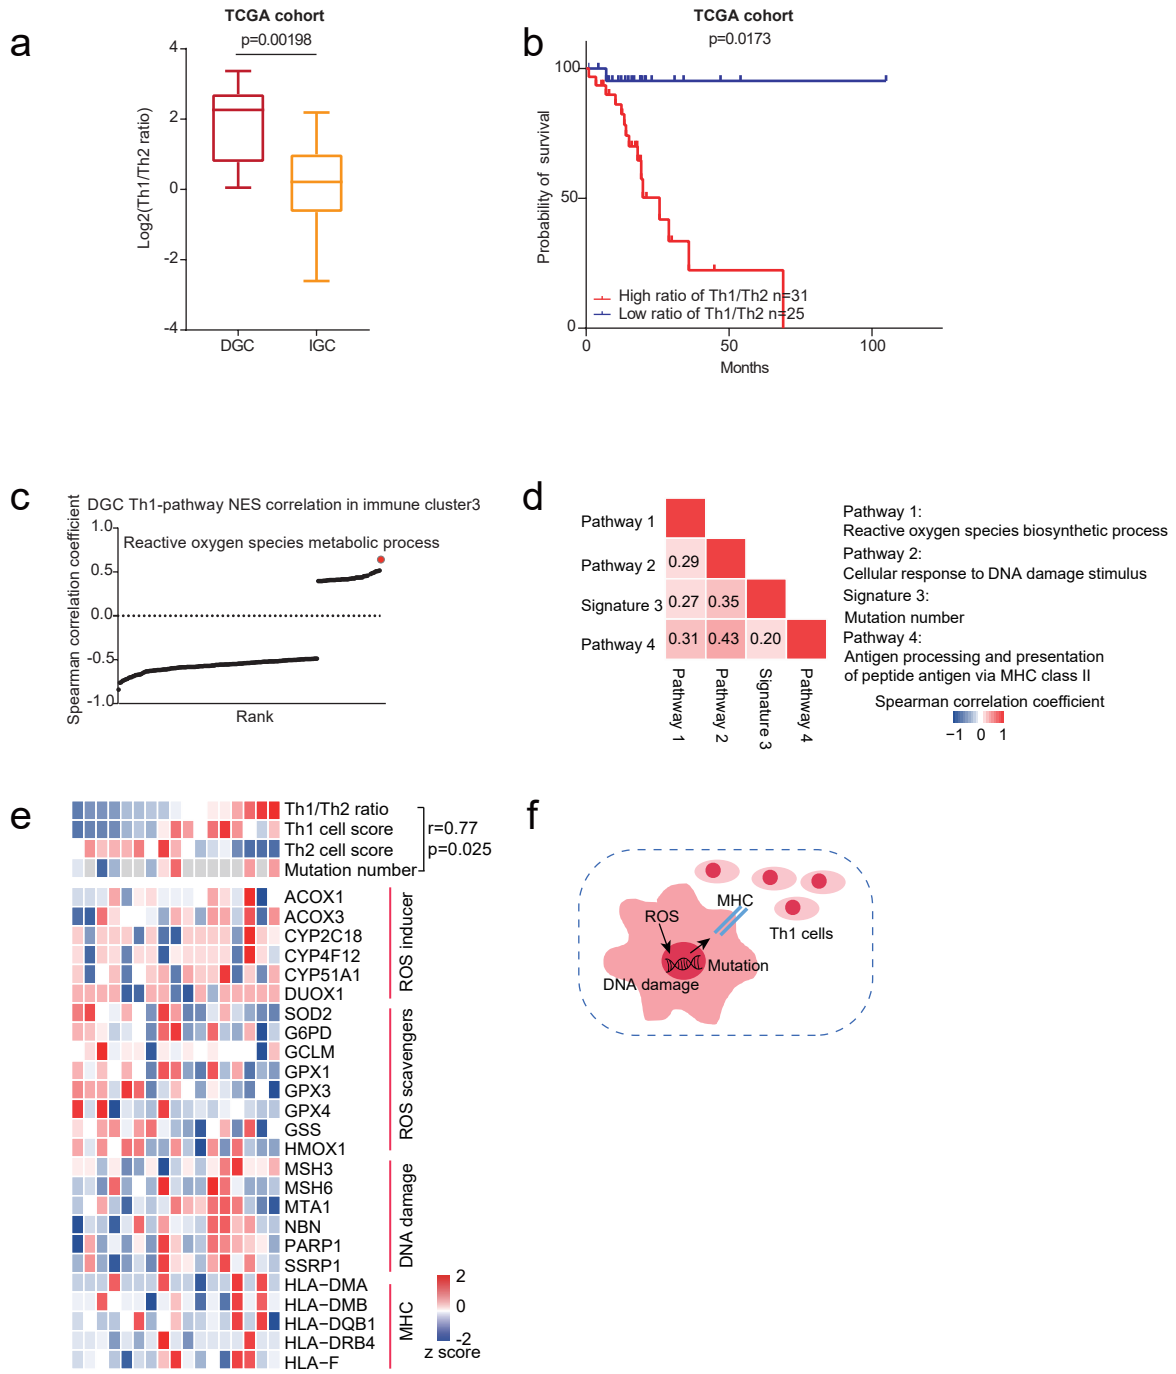

**Supplementary Figure 12. The correlation between Th1/Th2 ratio and ROS.**

Related to Figure 7. **a**, Th1/Th2 ratio was higher in DGC than IGC in TCGA cohort.  $n$  (DGC) = 9 and  $n$  (IGC) = 28 biologically independent samples. Boxplots showed median (central line), upper and lower quartiles (box limits), min to max range. The  $p$  value was calculated using two-sided Wilcoxon rank-sum test. **b**, Patients with high Th1/Th2 ratio had poor prognoses in TCGA cohort.  $n$  (low) = 25 and  $n$  (high) = 31 biologically independent samples. The  $p$  values were from Log rank test. **c**, The correlation between Th1 score and GSEA pathway NES in DGC immune cluster 3. **d**, The correlation among pathways or signatures in DGC immune cluster 3. **e**, A list of proteins in related pathways in DGC immune cluster 3. The correlation coefficient and  $p$  value were from Spearman's correlation test. **f**, Summary of Th1 cells recruitment mechanism in DGC immune cluster 3. Source data are provided as a Source Data file.
