# Supplementary material for: Multilevel proteomic analyses reveal molecular diversity between diffuse-type and intestinal-type gastric cancer
Source: PubMed Central journal article supplement (PMC9929250; doi:10.1038/s41467-023-35797-6), 2023-02-14
Supplement: 41467_2023_35797_MOESM2_ESM.pdf [file 41467_2023_35797_MOESM2_ESM.pdf]

### **Description of Additional Supplementary Files**

File Name: Supplementary Data 1

Description: Clinical characteristics of GC patients.

File Name: Supplementary Data 2

Description: The result of targeted sequencing.

File Name: Supplementary Data 3

Description: Lists of differentially expressed proteins in tumor tissues and NATs.

File Name: Supplementary Data 4

Description: Lists of differentially expressed proteins in DGC and IGC.

File Name: Supplementary Data 5

Description: Characteristics of proteomic subtypes.

File Name: Supplementary Data 6

Description: TF activity characteristics of 196 GC patients.

File Name: Supplementary Data 7

Description: Immune infiltration signatures in GC.
